# Supplementary material for: Preparation of 1D cubic Cd0.8Zn0.2S solid-solution nanowires using levelling effect of TGA and improved photocatalytic H2-production activity
Source: Royal Society of Chemistry journal article supplement (doi:10.1039/c4ta05615a), 2014-11-19
Supplement: c4ta05615a1.pdf [file c4ta05615a1.pdf]

**Title:** Preparation of 1D cubic  $\text{Cd}_{0.8}\text{Zn}_{0.2}\text{S}$  solid solution nanowires using levelling effect of TGA and improved photocatalytic  $\text{H}_2$ -production activity

**Authors:** Zhonghui Han, Gang Chen\*, Chunmei Li, Yaoguang Yu, Yansong Zhou

## Electronic supporting information (ESI)

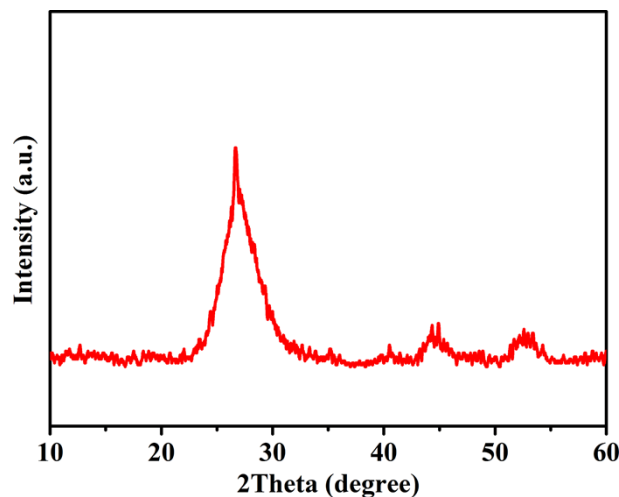

Fig. S1 XRD pattern of the as prepared  $\text{Cd}_{0.8}\text{Zn}_{0.2}\text{S}$  solid solution at 180 °C.

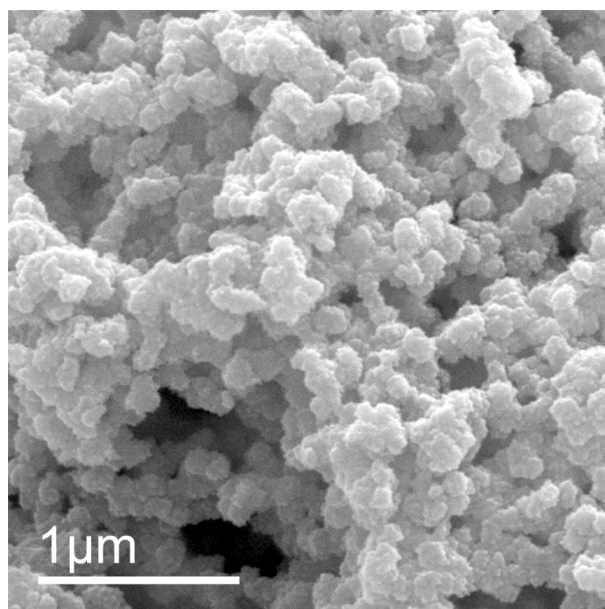

Fig. S2 SEM image of the as-prepared  $\text{Cd}_{0.8}\text{Zn}_{0.2}\text{S}$  solid solution at 180 °C

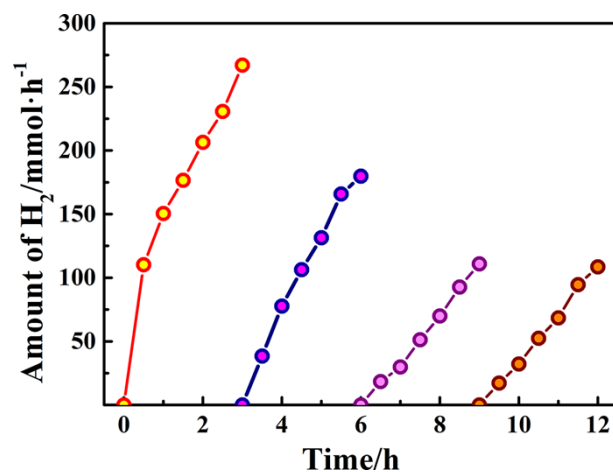

Fig. S3 Cycle operation of H<sub>2</sub> evolution on the as-prepared 1D Cd<sub>0.8</sub>Zn<sub>0.2</sub>S solid solution nanowires.

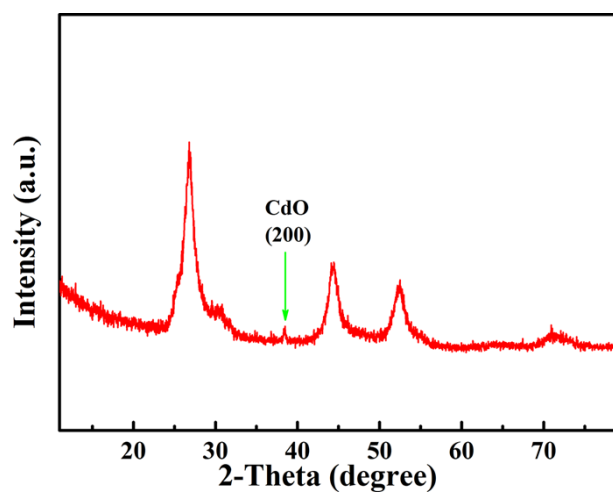

Fig. S4 XRD pattern of the 1D Cd<sub>0.8</sub>Zn<sub>0.2</sub>S solid solution nanowires after cycling for 12 h.

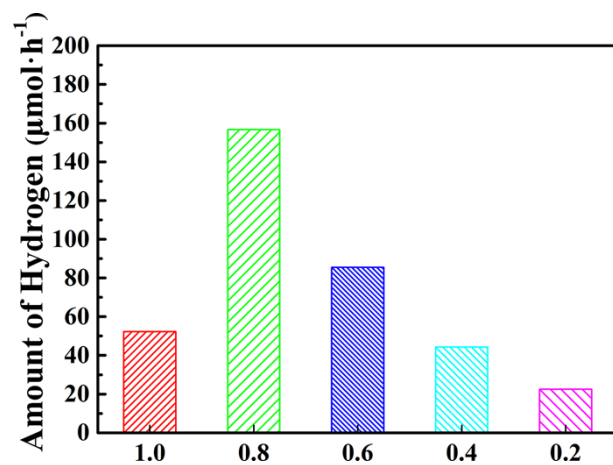

Fig. S3 Photocatalytic activities of the Cd<sub>x</sub>Zn<sub>1-x</sub>S with different Cd-Zn ratio,  $x=1, 0.8, 0.6, 0.4, 0.2$ .
